# Supplementary material
Source: HighWire-hosted journal article supplement (https://www.jneurosci.org/highwire/filestream/600268/field_highwire_adjunct_files/0/Figure_S1.pdf)

mouse e11.5 brachial

*Lim1*

*Isl1*

*Src*

*Fyn*

*Csk*

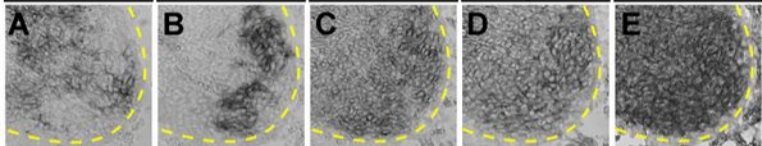

chick HH st. 25/26 (e5) lumbar

mouse e11.5 brachial

mouse e11.5 lumbar

*Yes*

*Lyn*

*Yes*

*Lyn*

*Yes*

*Lyn*

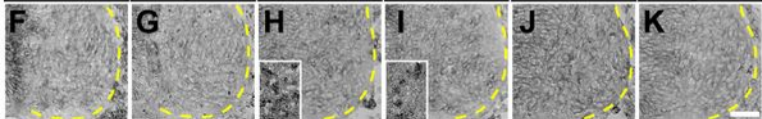

Supplement: Figure_S1.pdf [file Figure_S1.pdf]
